# Supplementary material for: Anti-inflammatory effect of Lycium barbarum on polarized human intestinal epithelial cells
Source: PubMed Central journal article supplement — Nutr Res Pract. 2019 Mar 11;13(2):95–104. doi: 10.4162/nrp.2019.13.2.95 (PMC6449548; doi:10.4162/nrp.2019.13.2.95), 2019-03-11
Supplement: nrp-13-95-s001.pdf [file nrp-13-95-s001.pdf]

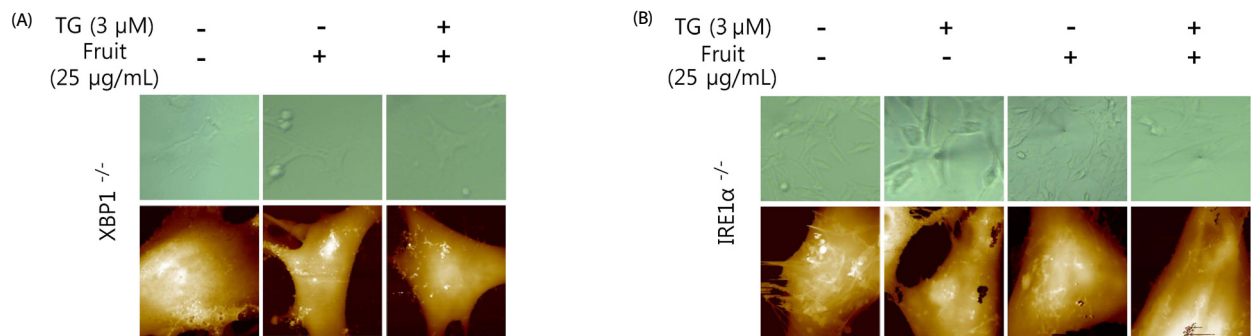

**Supplementary Fig. 1.** Effect of LF on cell surface morphology. XBP1 KO MEF (A) and IRE1 $\alpha$  KO MEF (B) cell lines were pretreated with LF for 24 h, followed by 3  $\mu$ M TG for additional 4 h. Cells were fixed with 4% paraformaldehyde and the cell surface pictures were taken by AFM.
